# Supplementary material
Source: PubMed Central journal article supplement (PMC2242684)
Supplement: pnas_0707284105_1.pdf [file pnas_0707284105_1.pdf]

$d_c = 1.4 \text{ \AA}$

| ID* | $n^\dagger$ | $\langle \text{rmsd} \rangle^\ddagger$ | $\langle k \rangle^\S$ |
|-----|-------------|----------------------------------------|------------------------|
| 1   | 173         | 2.74                                   | 42.7                   |
| 2   | 388         | 8.37                                   | 37.9                   |
| 3   | 366         | 6.11                                   | 21.9                   |
| 4   | 85          | 9.53                                   | 9.7                    |
| 5   | 130         | 12.09                                  | 8.6                    |

$d_c = 2.0 \text{ \AA}$

| ID | $n^\dagger$ | $\langle \text{rmsd} \rangle^\ddagger$ | $\langle k \rangle^\S$ |
|----|-------------|----------------------------------------|------------------------|
| 1  | 268         | 3.30                                   | 29.1                   |
| 2  | 127         | 9.43                                   | 24.6                   |
| 3  | 90          | 6.79                                   | 20.3                   |
| 4  | 650         | 7.14                                   | 12.1                   |
| 5  | 184         | 6.73                                   | 8.0                    |
| 6  | 28          | 4.96                                   | 4.9                    |

$d_c = 1.1 \text{ \AA}$

| ID | $n^\dagger$ | $\langle \text{rmsd} \rangle^\ddagger$ | $\langle k \rangle^\S$ |
|----|-------------|----------------------------------------|------------------------|
| 1  | 147         | 2.68                                   | 12.2                   |
| 2  | 298         | 8.31                                   | 11.5                   |
| 3  | 134         | 5.42                                   | 8.9                    |
| 4  | 43          | 11.82                                  | 3.6                    |
| 5  | 28          | 9.79                                   | 3.6                    |

$d_c = 1.5 \text{ \AA}$

| ID | $n^\dagger$ | $\langle \text{rmsd} \rangle^\ddagger$ | $\langle k \rangle^\S$ |
|----|-------------|----------------------------------------|------------------------|
| 1  | 149         | 2.82                                   | 11.8                   |
| 2  | 96          | 9.35                                   | 10.5                   |
| 3  | 54          | 6.67                                   | 7.6                    |
| 4  | 31          | 5.97                                   | 6.5                    |
| 5  | 68          | 5.48                                   | 5.3                    |
| 6  | 37          | 7.88                                   | 4.9                    |
| 7  | 76          | 7.96                                   | 4.7                    |
| 8  | 25          | 6.81                                   | 3.1                    |

$d_c = 0.9 \text{ \AA}$

| ID | $n^\dagger$ | $\langle \text{rmsd} \rangle^\ddagger$ | $\langle k \rangle^\S$ |
|----|-------------|----------------------------------------|------------------------|
| 1  | 74          | 2.63                                   | 4.4                    |
| 2  | 102         | 7.99                                   | 4.0                    |
| 3  | 39          | 5.30                                   | 2.7                    |
| 4  | 23          | 8.08                                   | 2.4                    |

$d_c = 1.4 \text{ \AA}$

| ID | $n^\dagger$ | $\langle \text{rmsd} \rangle^\ddagger$ | $\langle k \rangle^\S$ |
|----|-------------|----------------------------------------|------------------------|
| 1  | 106         | 2.60                                   | 10.8                   |
| 2  | 58          | 9.31                                   | 10.7                   |
| 3  | 33          | 6.43                                   | 6.6                    |
| 4  | 32          | 6.77                                   | 5.4                    |
| 5  | 47          | 5.42                                   | 4.4                    |
| 6  | 28          | 9.70                                   | 4.1                    |
| 7  | 22          | 7.96                                   | 4.1                    |
| 8  | 61          | 7.89                                   | 3.9                    |

\*Cluster ID sorted by  $\langle k \rangle$ .

$^\dagger$ Number of structures in a cluster.

$^\ddagger$ Average rmsd of structures from the experimental structure.

$^\S$ Average connectivity of structures.

(A)

(B)
