# Supplementary material
Source: PubMed Central journal article supplement (PMC2242684)

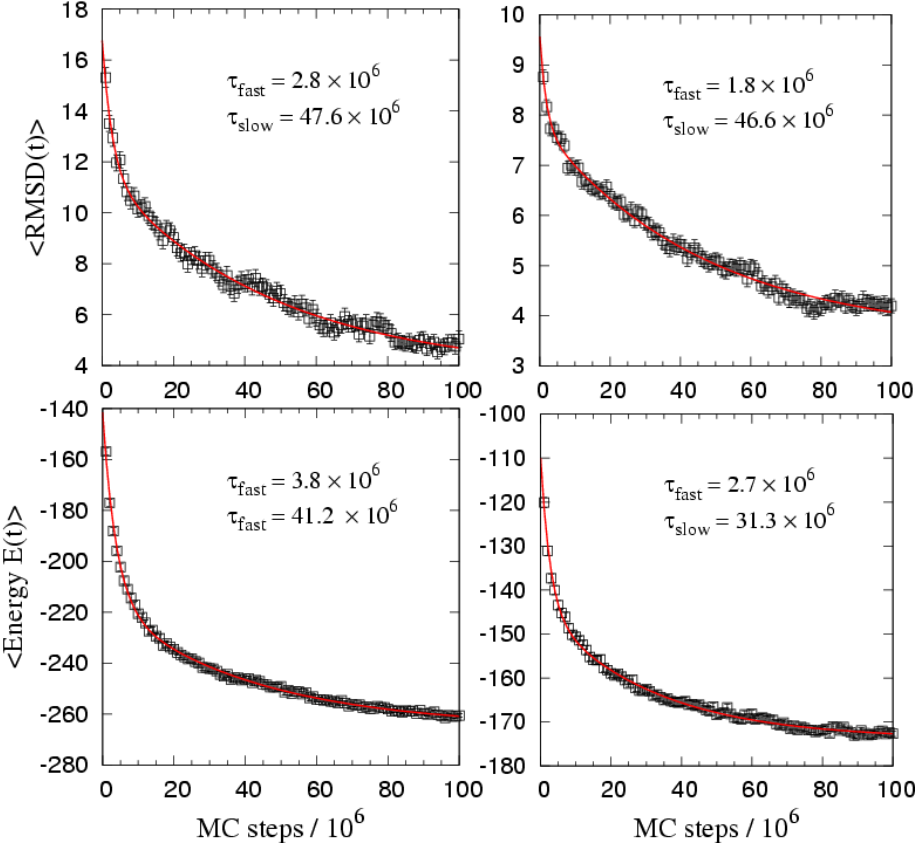

Supplement: pnas_0707284105_2.pdf [file pnas_0707284105_2.pdf]

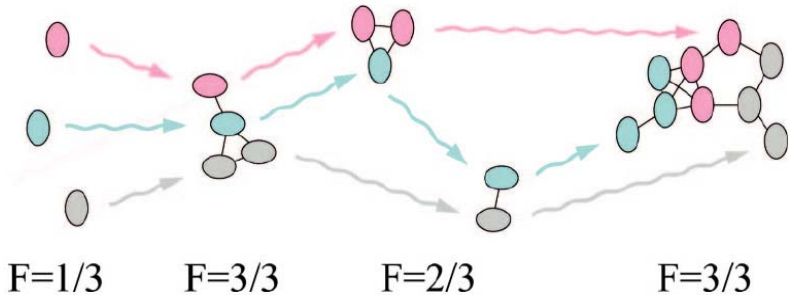

Supplement: pnas_0707284105_3.pdf [file pnas_0707284105_3.pdf]

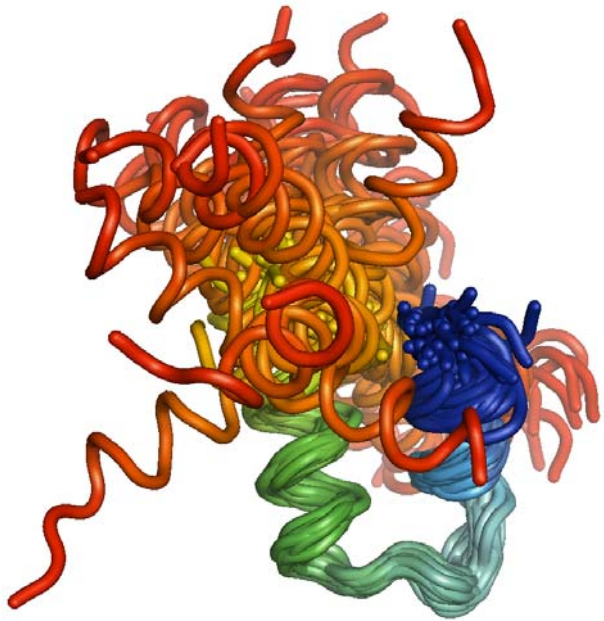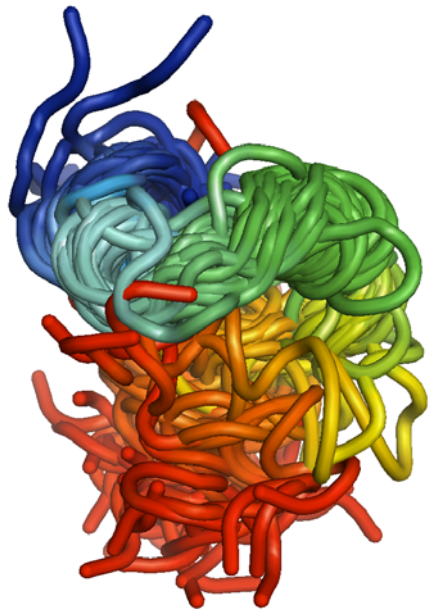

Supplement: pnas_0707284105_4.pdf [file pnas_0707284105_4.pdf]

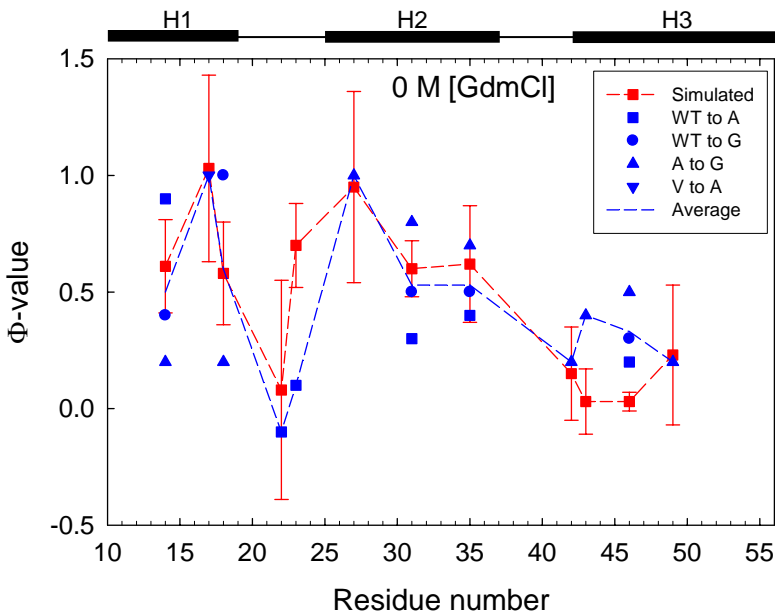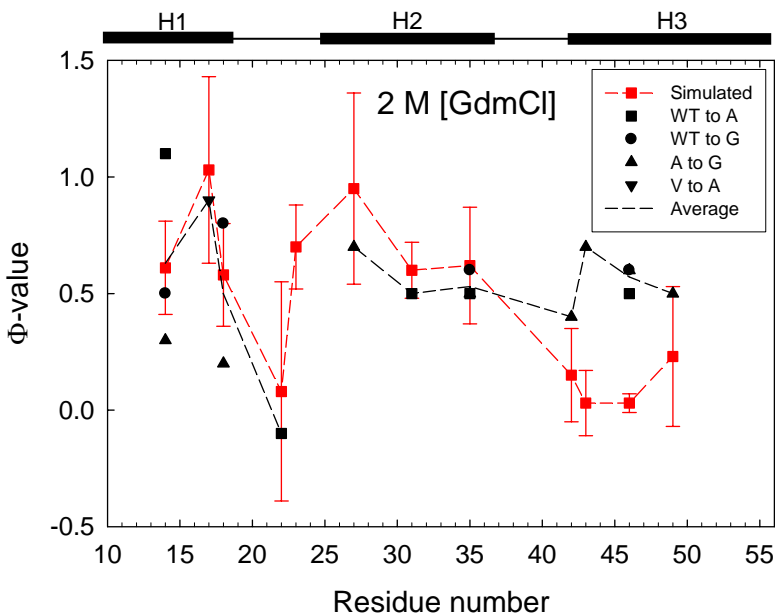

Supplement: pnas_0707284105_5.pdf [file pnas_0707284105_5.pdf]

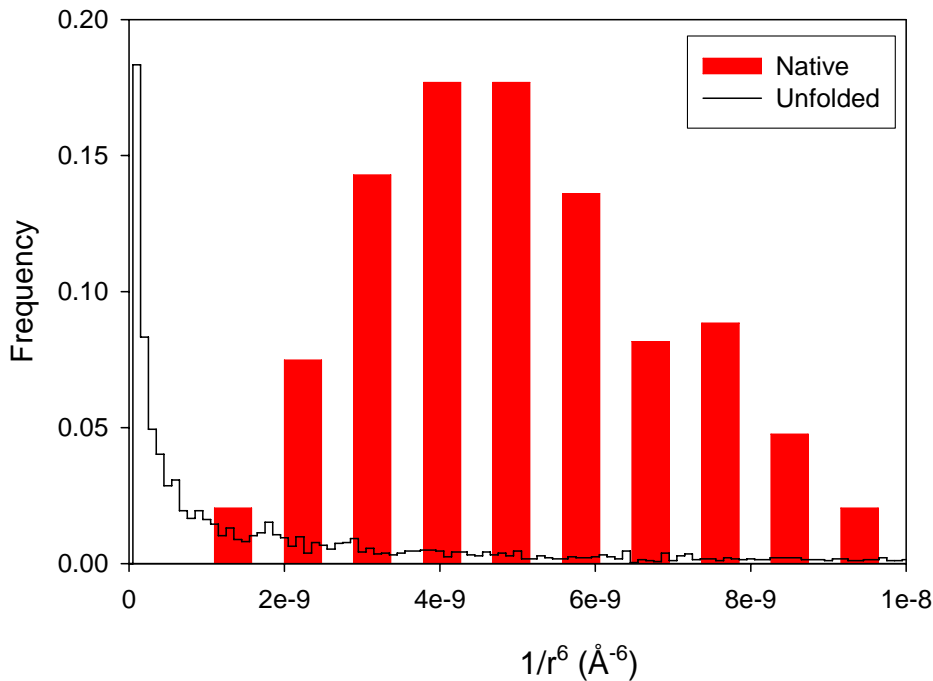

Supplement: pnas_0707284105_6.pdf [file pnas_0707284105_6.pdf]

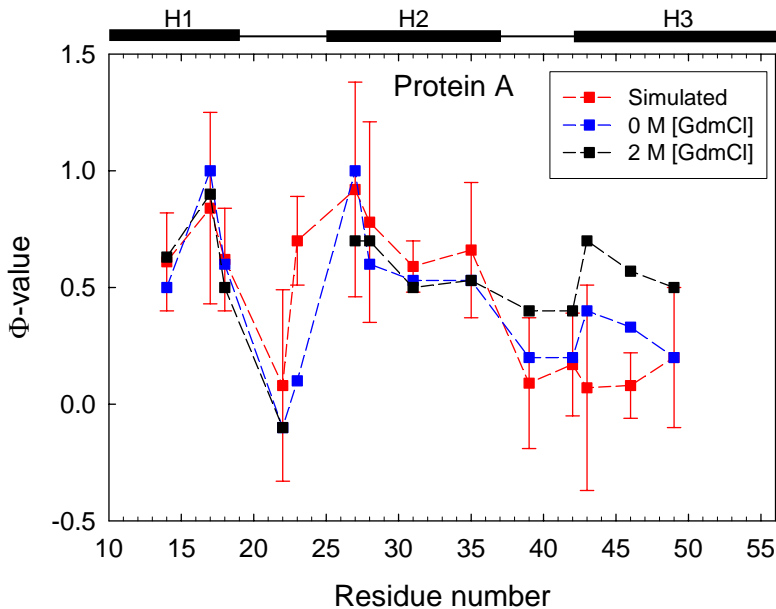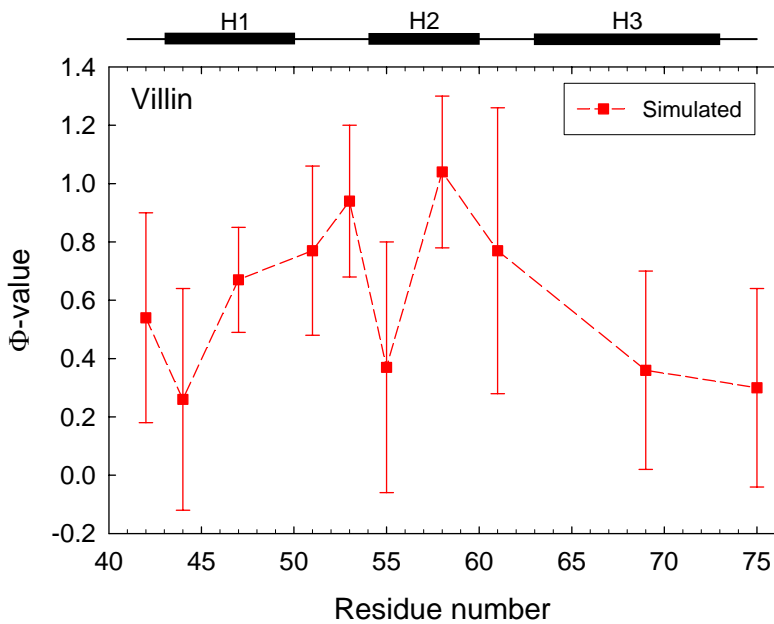

Supplement: pnas_0707284105_7.pdf [file pnas_0707284105_7.pdf]
